# Supplementary material for: CYpHER: catalytic extracellular targeted protein degradation with high potency and durable effect
Source: PubMed Central journal article supplement — Nat Commun. 2024 Oct 9;15:8731. doi: 10.1038/s41467-024-52975-2 (PMC11464628; doi:10.1038/s41467-024-52975-2), 2024-10-09
Supplement: 41467_2024_52975_MOESM3_ESM.pdf [file 41467_2024_52975_MOESM3_ESM.pdf]

## **Description of Additional Supplementary Files**

### **Supplementary Data**

Supplementary Data includes full data, descriptive statistics (percentiles, mean, error, N), and statistical assessment outputs for each experiment.
